# Supplementary material for: MIT-001 Restores Human Placenta-Derived Mesenchymal Stem Cells by Enhancing Mitochondrial Quiescence and Cytoskeletal Organization
Source: Int J Mol Sci. 2021 May 11;22(10):5062. doi: 10.3390/ijms22105062 (PMC8151078; doi:10.3390/ijms22105062)
Supplement: Supplementary file 1 [file ijms-22-05062-s001.zip]

Archive with 6 entries (6 files):
- Control MSC Mito(G) Mito(R)-4s.mov
- MITTI MSC Mito(G) Mito(R)-5s.mov
- Primer table.pdf
- Supplement Figure S1.pdf
- Supplement Figure text.pdf
- TI MSC Mito(G) Mito(R)-4s.mov
