# Supplementary material for: MIT-001 Restores Human Placenta-Derived Mesenchymal Stem Cells by Enhancing Mitochondrial Quiescence and Cytoskeletal Organization
Source: Int J Mol Sci. 2021 May 11;22(10):5062. doi: 10.3390/ijms22105062 (PMC8151078; doi:10.3390/ijms22105062)
Supplement: Supplementary file 1 [file ijms-22-05062-s001.zip › Primer table.pdf]

**Table S1. Primer set for real-time qPCR**

| Primer name     | Gene code      | Forward primer                                              | PCR condition | Product size |
|-----------------|----------------|-------------------------------------------------------------|---------------|--------------|
|                 |                | Backward primer                                             |               |              |
| <b>hβ-actin</b> | X00351.1       | 5'-ACAATGTGGCCGAGGACTTT -3'<br>5'-TGTGTGGACTTGGGAGAGGA -3'  | 58°C          | 104          |
| <b>hCCNA2</b>   | NM_001237.5    | 5'-TGCTGACCCATACCTCAAGT-3'<br>5'-TGACTGTTGTGCATGCTGTG-3'    | 58°C          | 211          |
| <b>hP16</b>     | NM_000077.4    | 5'- CGGAGGAAGAAAGAGGAGGG-3'<br>5'- GGCCTCCGACCGTAACCTATT-3' | 58°C          | 252          |
| <b>hOCT4</b>    | NM_002701.6    | 5'-GGAGTTTGTGCCAGGGTTTT-3'<br>5'-ACTTCACCTTCCCTCCAACC-3'    | 58°C          | 238          |
| <b>hNANOG</b>   | NM_024865.4    | 5'-AAGGTCCCGGTCAAGAAACA-3'<br>5'-TCTGCGTCACACCATTGCTA-3'    | 58°C          | 175          |
| <b>hDRP1</b>    | NM_001278464.1 | 5'- TCCATGAGACTTTTGGGCGA-3'<br>5'- TTGCCGCTTCACCAGTAACT-3'  | 58°C          | 152          |
| <b>hMFN1</b>    | NM_033540.3    | 5'- ACAAGGTGAATGAGCGGCTT-3'<br>5'- TCCACCAAGAAATGCAGGCA-3'  | 58°C          | 136          |
| <b>hMFN2</b>    | NM_014874.4    | 5'- ACCGTGATCAATGCCATGCT-3'<br>5'- TGGTTCACAGTCTTGCGCACT-3' | 58°C          | 155          |
| <b>hIL-1β</b>   | NM_000576.3    | 5'- TCAGCACCTCTCAAGCAGAA-3'<br>5'- TCCACATTCAGCACAGGACT-3'  | 58°C          | 136          |
| <b>hIL-6</b>    | NM_000600.5    | 5'- AATAACCACCCCTGACCCAA-3'<br>5'- TGCTACATTTGCCGAAGAGC-3'  | 58°C          | 153          |
| <b>hMCP-1</b>   | NM_002982.4    | 5'- GCAAGTGTCCCAAAGAAGCT-3'<br>5'- TCCTGAACCCACTTCTGCTT-3'  | 58°C          | 85           |
